# Supplementary material for: Genome-Wide Identification and Expression Analysis of the NAC Gene Family in Kandelia obovata, a Typical Mangrove Plant
Source: MDPI journal article supplement (doi:10.3390/cimb44110381), 2022-11-13
Supplement: s1 [file s1]

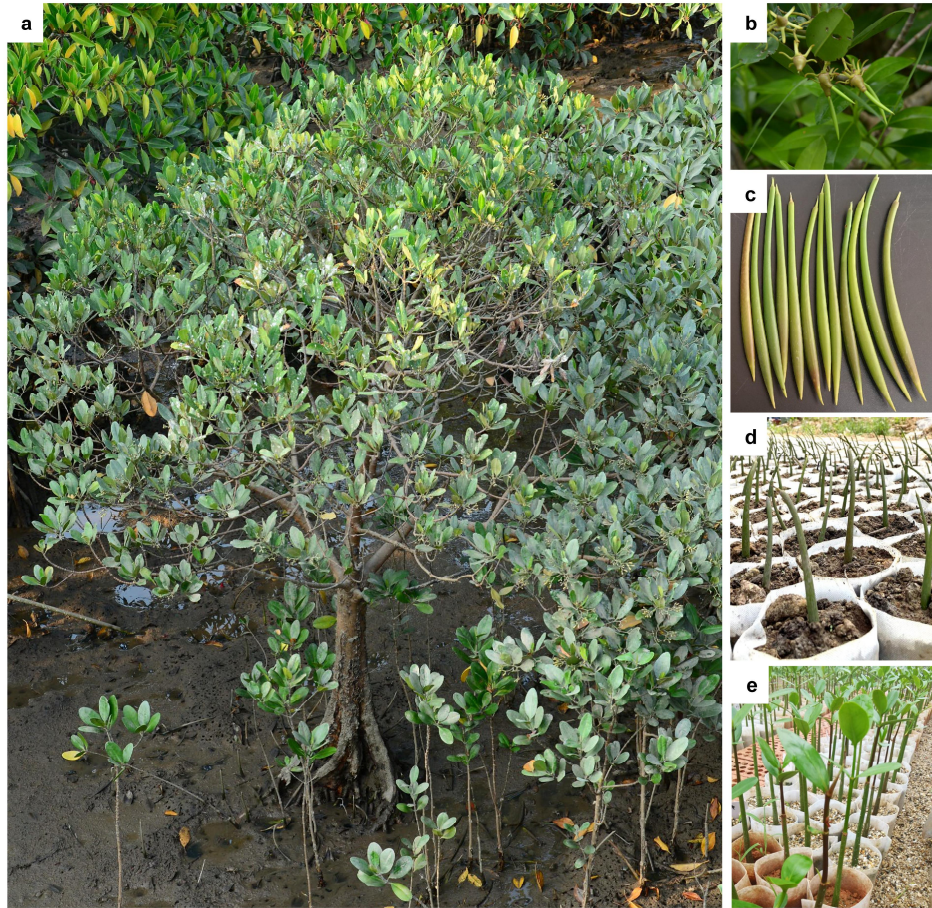

**Figure S1.** Morphological features of *K. obovata*. (a) *K. obovata* tree in the coastal wetland of Guangxi Maowei Hai Mangrove Nature Reserve, Qinzhou, China. (b) Young fruits with viviparous trait. (c) The sampled healthy mature propagules. (d) The propagules were cultured in rooting media for 5 days. (e) The growing seedlings were cultured from the propagules for 3 weeks.
