# Supplementary material for: Genome-Wide Identification and Expression Analysis of the NAC Gene Family in Kandelia obovata, a Typical Mangrove Plant
Source: MDPI journal article supplement (doi:10.3390/cimb44110381), 2022-11-13
Supplement: s1 [file s1]

**Table S1.** The basic information of *Arabidopsis* NAC genes

| Name    | Gene ID     | Class | Intron number | Average intron length (bp) | Protein length (aa) | pI   |
|---------|-------------|-------|---------------|----------------------------|---------------------|------|
| ANAC001 | AT1G01010.1 | V     | 5             | 117                        | 430                 | 4.89 |
| ANAC002 | AT1G01720.1 | VII   | 2             | 88                         | 290                 | 6.53 |
| ANAC003 | AT1G02220.1 | V     | 5             | 97                         | 395                 | 5.67 |
| ANAC004 | AT1G02230.1 | V     | 5             | 105                        | 360                 | 6.52 |
| ANAC005 | AT1G02250.1 | V     | 5             | 105                        | 363                 | 7.72 |
| ANAC006 | AT1G03490.1 | I     | 3             | 63                         | 282                 | 4.35 |
| ANAC007 | AT1G12260.1 | IX    | 3             | 384                        | 396                 | 6.23 |
| ANAC008 | AT1G25580.1 | III   | 5             | 238                        | 450                 | 4.69 |
| ANAC009 | AT1G26870.1 | VII   | 3             | 284                        | 426                 | 6.51 |
| ANAC010 | AT1G28470.1 | III   | 2             | 333                        | 315                 | 7.62 |
| ANAC011 | AT1G32510.1 | VIII  | 3             | 90                         | 284                 | 5.11 |
| ANAC012 | AT1G32770.1 | IX    | 2             | 267                        | 359                 | 5.58 |
| ANAC013 | AT1G32870.1 | VI    | 2             | 182                        | 529                 | 4.77 |
| ANAC014 | AT1G33060.2 | V     | 6             | 171                        | 653                 | 5.77 |
| ANAC015 | AT1G33280.1 | IX    | 2             | 89                         | 306                 | 8.07 |
| ANAC016 | AT1G34180.2 | VI    | 4             | 167                        | 577                 | 4.97 |
| ANAC017 | AT1G34190.1 | VI    | 3             | 172                        | 558                 | 4.56 |
| ANAC018 | AT1G52880.1 | VII   | 2             | 93                         | 321                 | 8.57 |
| ANAC019 | AT1G52890.1 | VII   | 2             | 101                        | 318                 | 6.41 |
| ANAC020 | AT1G54330.1 | VIII  | 2             | 136                        | 302                 | 5.47 |
| ANAC021 | AT1G56010.2 | X     | 2             | 660                        | 325                 | 7.27 |
| ANAC022 | AT1G56010.1 | X     | 1             | 103                        | 257                 | 8.21 |
| ANAC023 | AT1G60280.1 | III   | 0             | 0                          | 348                 | 7.28 |
| ANAC024 | AT1G60350.1 | III   | 0             | 0                          | 321                 | 7.62 |
| ANAC025 | AT1G61110.1 | VII   | 2             | 178                        | 324                 | 8.14 |
| ANAC026 | AT1G62700.1 | IX    | 2             | 258                        | 395                 | 6.64 |
| ANAC027 | AT1G64105.1 | V     | 0             | 0                          | 162                 | 5.87 |
| ANAC028 | AT1G65910.1 | VIII  | 5             | 257                        | 632                 | 6.62 |
| ANAC029 | AT1G69490.1 | VII   | 2             | 93                         | 269                 | 6.86 |
| ANAC030 | AT1G71930.1 | IX    | 2             | 326                        | 325                 | 6.51 |
| ANAC031 | AT1G76420.1 | X     | 2             | 402                        | 335                 | 6.46 |
| ANAC032 | AT1G77450.1 | VII   | 2             | 97                         | 254                 | 8.66 |
| ANAC033 | AT1G79580.1 | IX    | 3             | 339                        | 372                 | 7.22 |
| ANAC034 | AT2G02450.1 | VII   | 3             | 490                        | 379                 | 6.51 |
| ANAC035 | AT2G02450.2 | VII   | 2             | 682                        | 415                 | 6.65 |
| ANAC036 | AT2G17040.1 | VII   | 2             | 85                         | 277                 | 9.25 |
| ANAC037 | AT2G18060.1 | IX    | 2             | 405                        | 366                 | 5.23 |
| ANAC038 | AT2G24430.1 | X     | 3             | 696                        | 317                 | 8.43 |
| ANAC039 | AT2G24430.2 | X     | 2             | 961                        | 316                 | 8.43 |
| ANAC040 | AT2G27300.1 | V     | 3             | 178                        | 336                 | 6.28 |

**Table S1 (continued).** The basic information of *Arabidopsis* NAC genes

| Name    | Gene ID     | Class | Intron number | Average intron length (bp) | Protein length (aa) | pI   |
|---------|-------------|-------|---------------|----------------------------|---------------------|------|
| ANAC041 | AT2G33480.1 | VII   | 2             | 84                         | 269                 | 9.51 |
| ANAC042 | AT2G43000.1 | VII   | 2             | 571                        | 276                 | 8.30 |
| ANAC043 | AT2G46770.1 | IX    | 2             | 405                        | 366                 | 6.75 |
| ANAC044 | AT3G01600.1 | III   | 4             | 158                        | 371                 | 5.50 |
| ANAC045 | AT3G03200.1 | VIII  | 5             | 190                        | 480                 | 5.34 |
| ANAC046 | AT3G04060.1 | X     | 2             | 157                        | 339                 | 6.79 |
| ANAC047 | AT3G04070.1 | VII   | 2             | 163                        | 360                 | 7.03 |
| ANAC048 | AT3G04420.1 | V     | 5             | 86                         | 343                 | 5.09 |
| ANAC049 | AT3G04430.1 | V     | 3             | 296                        | 199                 | 5.84 |
| ANAC050 | AT3G10480.3 | VI    | 7             | 114                        | 527                 | 6.34 |
| ANAC051 | AT3G10490.1 | VI    | 4             | 304                        | 238                 | 7.74 |
| ANAC052 | AT3G10490.2 | VI    | 4             | 315                        | 452                 | 5.42 |
| ANAC053 | AT3G10500.1 | VI    | 5             | 105                        | 550                 | 4.37 |
| ANAC054 | AT3G15170.1 | X     | 2             | 297                        | 311                 | 8.20 |
| ANAC055 | AT3G15500.1 | VII   | 2             | 100                        | 318                 | 8.87 |
| ANAC056 | AT3G15510.1 | VII   | 2             | 125                        | 365                 | 7.74 |
| ANAC057 | AT3G17730.1 | VIII  | 2             | 348                        | 247                 | 4.67 |
| ANAC058 | AT3G18400.1 | X     | 2             | 453                        | 315                 | 6.52 |
| ANAC059 | AT3G29035.1 | X     | 2             | 107                        | 319                 | 8.42 |
| ANAC060 | AT3G44290.1 | V     | 3             | 369                        | 336                 | 5.29 |
| ANAC061 | AT3G44350.2 | VII   | 2             | 464                        | 242                 | 8.64 |
| ANAC062 | AT3G49530.1 | V     | 5             | 135                        | 470                 | 5.94 |
| ANAC063 | AT3G55210.1 | II    | 2             | 93                         | 281                 | 6.13 |
| ANAC064 | AT3G56530.1 | II    | 2             | 89                         | 320                 | 5.43 |
| ANAC065 | AT3G56560.1 | II    | 2             | 390                        | 229                 | 9.63 |
| ANAC066 | AT3G61910.1 | IX    | 1             | 211                        | 335                 | 6.04 |
| ANAC067 | AT4G01520.1 | V     | 3             | 622                        | 303                 | 5.57 |
| ANAC068 | AT4G01540.1 | V     | 5             | 146                        | 474                 | 6.10 |
| ANAC069 | AT4G01550.1 | V     | 5             | 166                        | 458                 | 5.26 |
| ANAC070 | AT4G10350.1 | IX    | 2             | 260                        | 342                 | 7.26 |
| ANAC071 | AT4G17980.1 | VIII  | 4             | 101                        | 263                 | 8.38 |
| ANAC072 | AT4G27410.3 | VII   | 2             | 72                         | 315                 | 8.64 |
| ANAC073 | AT4G28500.1 | III   | 2             | 169                        | 306                 | 9.27 |
| ANAC074 | AT4G28530.1 | X     | 2             | 1411                       | 353                 | 6.07 |
| ANAC075 | AT4G29230.1 | III   | 5             | 625                        | 499                 | 7.04 |
| ANAC076 | AT4G36160.1 | IX    | 3             | 644                        | 378                 | 6.61 |
| ANAC077 | AT5G04400.1 | VI    | 3             | 206                        | 396                 | 5.18 |
| ANAC078 | AT5G04410.1 | VI    | 5             | 148                        | 568                 | 4.38 |
| ANAC079 | AT5G07680.1 | X     | 2             | 122                        | 330                 | 9.18 |
| ANAC080 | AT5G07680.2 | X     | 4             | 109                        | 315                 | 9.70 |

**Table S1 (continued).** The basic information of *Arabidopsis* NAC genes

| Name    | Gene ID     | Class | Intron number | Average intron length (bp) | Protein length (aa) | pI   |
|---------|-------------|-------|---------------|----------------------------|---------------------|------|
| ANAC081 | AT5G08790.1 | VII   | 2             | 91                         | 284                 | 5.47 |
| ANAC082 | AT5G09330.1 | VI    | 4             | 217                        | 490                 | 4.47 |
| ANAC083 | AT5G13180.1 | VII   | 2             | 89                         | 253                 | 9.14 |
| ANAC084 | AT5G14000.1 | IV    | 2             | 120                        | 207                 | 9.48 |
| ANAC085 | AT5G14490.1 | III   | 3             | 81                         | 351                 | 6.79 |
| ANAC086 | AT5G17260.1 | VIII  | 5             | 233                        | 477                 | 5.23 |
| ANAC087 | AT5G18270.1 | X     | 2             | 249                        | 336                 | 6.11 |
| ANAC088 | AT5G18300.1 | V     | 0             | 0                          | 148                 | 5.37 |
| ANAC089 | AT5G22290.1 | V     | 3             | 145                        | 341                 | 5.21 |
| ANAC090 | AT5G22380.1 | VII   | 2             | 205                        | 236                 | 5.77 |
| ANAC091 | AT5G24590.2 | V     | 4             | 113                        | 452                 | 5.85 |
| ANAC092 | AT5G39610.1 | X     | 2             | 102                        | 286                 | 5.94 |
| ANAC093 | AT5G39690.1 | II    | 3             | 378                        | 295                 | 4.63 |
| ANAC094 | AT5G39820.1 | VII   | 2             | 90                         | 338                 | 8.67 |
| ANAC095 | AT5G41090.1 | IV    | 1             | 136                        | 213                 | 4.24 |
| ANAC096 | AT5G46590.1 | VIII  | 3             | 86                         | 293                 | 4.95 |
| ANAC097 | AT5G50820.1 | I     | 2             | 101                        | 194                 | 4.68 |
| ANAC098 | AT5G53950.1 | X     | 2             | 352                        | 376                 | 8.52 |
| ANAC099 | AT5G56620.1 | III   | 4             | 366                        | 387                 | 8.77 |
| ANAC100 | AT5G61430.1 | X     | 2             | 109                        | 337                 | 8.20 |
| ANAC101 | AT5G62380.1 | IX    | 1             | 129                        | 349                 | 5.01 |
| ANAC102 | AT5G63790.1 | VII   | 2             | 95                         | 313                 | 8.65 |
| ANAC103 | AT5G64060.1 | VI    | 4             | 148                        | 357                 | 4.88 |
| ANAC104 | AT5G64530.1 | IV    | 2             | 389                        | 188                 | 4.69 |
| ANAC105 | AT5G66300.1 | IX    | 2             | 183                        | 293                 | 6.41 |
