# Supplementary material for: Genome-Wide Identification and Expression Analysis of the NAC Gene Family in Kandelia obovata, a Typical Mangrove Plant
Source: MDPI journal article supplement (doi:10.3390/cimb44110381), 2022-11-13
Supplement: s1 [file s1]

**Table S4.** The FPKM values of *KoNAC* genes expressed in different organs

| <b>Genes</b>   | <b>root</b> | <b>stem</b> | <b>leaf</b> | <b>flower</b> | <b>sepal</b> | <b>stamen</b> | <b>pistil</b> | <b>fruit</b> |
|----------------|-------------|-------------|-------------|---------------|--------------|---------------|---------------|--------------|
| <i>KoNAC1</i>  | 3.13        | 17.80       | 18.75       | 25.46         | 21.44        | 21.01         | 13.25         | 42.47        |
| <i>KoNAC2</i>  | 5.90        | 3.06        | 4.21        | 1.33          | 4.99         | 0.45          | 3.11          | 1.39         |
| <i>KoNAC3</i>  | 0.18        | 0.00        | 0.46        | 0.85          | 0.16         | 0.18          | 0.87          | 0.24         |
| <i>KoNAC4</i>  | 21.38       | 7.41        | 8.38        | 2.89          | 2.27         | 2.50          | 6.44          | 8.34         |
| <i>KoNAC5</i>  | 51.51       | 72.15       | 70.58       | 47.65         | 41.13        | 50.08         | 48.37         | 30.77        |
| <i>KoNAC6</i>  | 64.95       | 26.92       | 35.32       | 327.95        | 29.17        | 299.22        | 32.58         | 390.28       |
| <i>KoNAC7</i>  | 5.60        | 0.66        | 0.94        | 12.36         | 1.19         | 13.91         | 10.87         | 16.33        |
| <i>KoNAC8</i>  | 1.90        | 0.29        | 0.35        | 0.13          | 0.16         | 0.21          | 0.04          | 0.18         |
| <i>KoNAC9</i>  | 1.03        | 3.45        | 1.74        | 0.27          | 0.35         | 0.45          | 0.19          | 3.15         |
| <i>KoNAC10</i> | 4.40        | 1.95        | 1.48        | 7.32          | 16.43        | 1.73          | 5.91          | 1.43         |
| <i>KoNAC11</i> | 13.49       | 24.43       | 21.73       | 4.47          | 1.18         | 2.38          | 5.65          | 10.07        |
| <i>KoNAC12</i> | 56.23       | 69.62       | 67.25       | 55.50         | 62.30        | 61.16         | 60.64         | 51.43        |
| <i>KoNAC13</i> | 28.55       | 24.71       | 17.45       | 14.77         | 15.65        | 13.30         | 12.23         | 15.45        |
| <i>KoNAC14</i> | 6.74        | 9.42        | 7.99        | 3.65          | 2.22         | 3.25          | 3.73          | 2.65         |
| <i>KoNAC15</i> | 30.73       | 4.12        | 5.35        | 69.78         | 39.15        | 110.86        | 30.17         | 189.58       |
| <i>KoNAC16</i> | 1.87        | 0.60        | 0.80        | 1.47          | 1.02         | 1.70          | 1.90          | 1.12         |
| <i>KoNAC17</i> | 0.00        | 0.46        | 0.67        | 1.13          | 0.25         | 0.98          | 2.59          | 0.21         |
| <i>KoNAC18</i> | 5.66        | 0.21        | 8.89        | 1.24          | 4.31         | 0.31          | 0.45          | 1.10         |
| <i>KoNAC19</i> | 3.58        | 4.39        | 2.85        | 0.17          | 1.20         | 0.27          | 0.69          | 1.18         |
| <i>KoNAC20</i> | 200.97      | 107.82      | 73.71       | 16.12         | 6.96         | 3.39          | 2.88          | 48.37        |
| <i>KoNAC21</i> | 0.92        | 0.23        | 1.35        | 0.19          | 0.14         | 0.43          | 0.31          | 0.31         |
| <i>KoNAC22</i> | 0.00        | 0.00        | 5.79        | 0.08          | 0.88         | 0.00          | 0.00          | 0.00         |
| <i>KoNAC23</i> | 7.26        | 2.13        | 13.14       | 18.13         | 10.49        | 16.98         | 6.05          | 9.16         |
| <i>KoNAC24</i> | 0.37        | 0.63        | 0.83        | 0.21          | 0.39         | 0.22          | 0.33          | 4.51         |
| <i>KoNAC25</i> | 33.88       | 40.55       | 51.26       | 22.88         | 22.44        | 40.30         | 21.53         | 25.41        |
| <i>KoNAC26</i> | 126.75      | 47.51       | 47.03       | 515.94        | 197.70       | 524.54        | 79.06         | 658.36       |
| <i>KoNAC27</i> | 39.06       | 48.13       | 38.58       | 33.76         | 18.79        | 66.19         | 24.30         | 56.15        |
| <i>KoNAC28</i> | 0.68        | 0.48        | 0.15        | 1.07          | 0.81         | 1.74          | 4.63          | 0.02         |
| <i>KoNAC29</i> | 120.48      | 81.62       | 78.11       | 46.96         | 41.48        | 47.11         | 30.02         | 58.43        |
| <i>KoNAC30</i> | 2.30        | 0.30        | 2.14        | 0.92          | 0.19         | 0.00          | 0.00          | 0.11         |
| <i>KoNAC31</i> | 4.38        | 7.38        | 3.83        | 1.73          | 5.52         | 0.61          | 0.18          | 36.32        |
| <i>KoNAC32</i> | 11.60       | 2.42        | 4.03        | 53.83         | 33.21        | 115.56        | 13.58         | 83.33        |
| <i>KoNAC33</i> | 0.00        | 0.00        | 0.21        | 0.15          | 0.08         | 0.62          | 0.20          | 0.11         |
| <i>KoNAC34</i> | 1.29        | 0.00        | 0.21        | 0.00          | 0.00         | 0.71          | 0.00          | 0.05         |
| <i>KoNAC35</i> | 11.50       | 4.93        | 0.81        | 4.04          | 2.42         | 11.87         | 3.23          | 9.31         |
| <i>KoNAC36</i> | 0.31        | 0.37        | 0.46        | 0.40          | 0.00         | 0.00          | 0.00          | 0.37         |
| <i>KoNAC37</i> | 11.89       | 10.89       | 0.42        | 14.95         | 0.00         | 37.32         | 0.00          | 1.04         |
| <i>KoNAC38</i> | 5.81        | 2.83        | 4.27        | 1.02          | 0.21         | 0.59          | 3.45          | 5.38         |
| <i>KoNAC39</i> | 2.86        | 1.86        | 3.29        | 1.97          | 2.26         | 1.84          | 0.99          | 5.57         |

**Table S4 (continued).** The FPKM values of *KoNAC* genes expressed in different organs

| <b>Genes</b>   | <b>root</b> | <b>stem</b> | <b>leaf</b> | <b>flower</b> | <b>sepal</b> | <b>stamen</b> | <b>pistil</b> | <b>fruit</b> |
|----------------|-------------|-------------|-------------|---------------|--------------|---------------|---------------|--------------|
| <i>KoNAC41</i> | 14.41       | 0.40        | 3.57        | 12.16         | 21.78        | 24.74         | 5.00          | 3.74         |
| <i>KoNAC42</i> | 5.24        | 2.23        | 0.44        | 0.53          | 0.36         | 0.52          | 0.70          | 2.12         |
| <i>KoNAC43</i> | 3.74        | 0.51        | 0.37        | 0.00          | 0.00         | 0.00          | 0.00          | 2.27         |
| <i>KoNAC44</i> | 6.99        | 10.55       | 9.09        | 4.09          | 3.17         | 3.07          | 6.67          | 4.10         |
| <i>KoNAC45</i> | 26.79       | 29.53       | 25.18       | 25.96         | 23.60        | 19.70         | 23.14         | 12.01        |
| <i>KoNAC46</i> | 29.44       | 0.27        | 0.79        | 0.53          | 0.00         | 0.05          | 0.00          | 0.94         |
| <i>KoNAC47</i> | 4.32        | 3.88        | 3.31        | 3.41          | 1.07         | 2.08          | 3.62          | 1.38         |
| <i>KoNAC48</i> | 1.71        | 2.36        | 0.73        | 0.58          | 0.00         | 0.33          | 0.36          | 0.84         |
| <i>KoNAC49</i> | 4.12        | 14.49       | 0.60        | 0.48          | 0.78         | 0.35          | 1.29          | 0.16         |
| <i>KoNAC50</i> | 2.59        | 2.10        | 21.20       | 78.09         | 32.17        | 99.81         | 1.99          | 198.42       |
| <i>KoNAC51</i> | 19.85       | 12.71       | 12.66       | 24.12         | 18.86        | 156.64        | 18.17         | 27.21        |
| <i>KoNAC52</i> | 31.32       | 18.43       | 28.21       | 8.68          | 8.59         | 8.70          | 5.21          | 5.13         |
| <i>KoNAC53</i> | 0.13        | 0.04        | 0.78        | 1.00          | 0.04         | 1.45          | 2.64          | 0.70         |
| <i>KoNAC54</i> | 69.33       | 7.01        | 3.70        | 3.29          | 0.59         | 2.57          | 4.51          | 6.90         |
| <i>KoNAC55</i> | 5.17        | 10.34       | 1.68        | 16.76         | 2.58         | 37.82         | 1.06          | 2.33         |
| <i>KoNAC56</i> | 53.34       | 30.93       | 132.40      | 30.27         | 40.57        | 27.56         | 35.75         | 34.66        |
| <i>KoNAC57</i> | 10.13       | 10.54       | 19.99       | 9.82          | 3.58         | 7.43          | 0.00          | 20.42        |
| <i>KoNAC58</i> | 16.91       | 25.32       | 7.61        | 17.44         | 13.51        | 20.06         | 24.42         | 18.85        |
| <i>KoNAC59</i> | 46.73       | 52.72       | 101.96      | 44.08         | 89.48        | 36.83         | 27.20         | 25.95        |
| <i>KoNAC60</i> | 165.07      | 70.98       | 84.14       | 61.77         | 68.21        | 60.43         | 78.37         | 65.88        |
| <i>KoNAC61</i> | 2.22        | 2.69        | 1.17        | 0.00          | 0.00         | 0.00          | 0.61          | 0.17         |
| <i>KoNAC62</i> | 6.19        | 9.65        | 2.22        | 2.17          | 1.94         | 3.40          | 5.73          | 2.02         |
| <i>KoNAC63</i> | 28.44       | 13.63       | 3.46        | 12.01         | 1.80         | 19.27         | 0.08          | 3.11         |
| <i>KoNAC64</i> | 5.09        | 0.26        | 0.33        | 0.00          | 0.00         | 0.28          | 0.17          | 1.31         |
| <i>KoNAC65</i> | 0.38        | 0.89        | 1.34        | 0.00          | 0.22         | 0.04          | 0.00          | 0.32         |
| <i>KoNAC66</i> | 0.00        | 0.00        | 0.14        | 0.33          | 0.08         | 0.17          | 0.00          | 0.00         |
| <i>KoNAC68</i> | 11.00       | 10.57       | 2.47        | 3.24          | 2.04         | 15.35         | 2.00          | 4.72         |
