# Supplementary material for: Genome-Wide Identification and Expression Analysis of the NAC Gene Family in Kandelia obovata, a Typical Mangrove Plant
Source: MDPI journal article supplement (doi:10.3390/cimb44110381), 2022-11-13
Supplement: s1 [file s1]

**Table S5.** The FPKM values of differentially expressed *KoNAC* genes under cold treatment

| Genes          | CK     | cold 1 | cold 2  | cold 4  |
|----------------|--------|--------|---------|---------|
| <i>KoNAC6</i>  | 20.86  | 15.44  | 667.83  | 812.82  |
| <i>KoNAC11</i> | 31.02  | 26.41  | 30.03   | 79.13   |
| <i>KoNAC15</i> | 2.32   | 4.75   | 152.24  | 264.52  |
| <i>KoNAC20</i> | 57.62  | 29.77  | 498.41  | 494.05  |
| <i>KoNAC24</i> | 0.10   | 0.22   | 0.53    | 2.74    |
| <i>KoNAC26</i> | 278.28 | 74.47  | 2149.77 | 2253.79 |
| <i>KoNAC32</i> | 2.02   | 0.84   | 10.02   | 50.99   |
| <i>KoNAC35</i> | 2.18   | 0.85   | 15.71   | 11.29   |
| <i>KoNAC38</i> | 5.82   | 2.28   | 33.67   | 212.60  |
| <i>KoNAC41</i> | 2.09   | 2.35   | 6.54    | 11.82   |
| <i>KoNAC51</i> | 24.63  | 5.40   | 26.59   | 12.65   |
| <i>KoNAC62</i> | 0.47   | 1.36   | 1.61    | 6.67    |
| <i>KoNAC68</i> | 3.24   | 1.99   | 6.54    | 29.21   |

Cold 1, first-time cold treatment; Cold 2, second-time cold treatment; Cold 4, fourth-time cold treatment.
