# Supplementary material for: Genome-Wide Identification and Expression Analysis of the NAC Gene Family in Kandelia obovata, a Typical Mangrove Plant
Source: MDPI journal article supplement (doi:10.3390/cimb44110381), 2022-11-13
Supplement: s1 [file s1]

**Table S3.** Common orthologous gene pairs of *K. obovata* between *A. thaliana* and *P. trichocarpa*

| Number | <i>K. obovata</i> | <i>Arabidopsis</i> | <i>P. trichocarpa</i> |
|--------|-------------------|--------------------|-----------------------|
| 1      | KoNAC1            | AT3G04060.1        | POPTR_0017s12210.1    |
| 2      | KoNAC10           | AT5G07680.1        | POPTR_0001s35490.1    |
| 3      | KoNAC12           | AT3G10480.3        | POPTR_0013s05080.1    |
| 4      | KoNAC14           | AT4G29230.1        | POPTR_0013s11740.1    |
| 5      | KoNAC18           | AT5G39820.1        | POPTR_0002s08150.1    |
| 6      | KoNAC19           | AT3G01600.1        | POPTR_0014s04080.1    |
| 7      | KoNAC2            | AT5G18270.1        | POPTR_0017s11830.1    |
| 8      | KoNAC20           | AT2G17040.1        | POPTR_0002s00730.1    |
| 9      | KoNAC23           | AT3G04070.1        | POPTR_0002s06210.1    |
| 10     | KoNAC24           | AT1G71930.1        | POPTR_0001s41490.1    |
| 11     | KoNAC25           | AT1G34180.2        | POPTR_0001s41460.1    |
| 12     | KoNAC26           | AT1G77450.1        | POPTR_0001s40680.1    |
| 13     | KoNAC28           | AT1G76420.1        | POPTR_0014s10330.1    |
| 14     | KoNAC29           | AT1G34180.2        | POPTR_0014s10320.1    |
| 15     | KoNAC31           | AT1G52880.1        | POPTR_0014s10060.1    |
| 16     | KoNAC32           | AT4G27410.3        | POPTR_0002s05820.1    |
| 17     | KoNAC33           | AT3G15170.1        | POPTR_0001s13380.1    |
| 18     | KoNAC34           | AT4G28530.1        | POPTR_0017s12210.1    |
| 19     | KoNAC35           | AT4G01540.1        | POPTR_0012s03100.1    |
| 20     | KoNAC36           | AT4G01520.1        | POPTR_0012s05280.1    |
| 21     | KoNAC37           | AT2G46770.1        | POPTR_0018s06790.1    |
| 22     | KoNAC38           | AT2G43000.1        | POPTR_0010s23630.1    |
| 23     | KoNAC39           | AT5G50820.1        | POPTR_0018s03910.1    |
| 24     | KoNAC4            | AT2G18060.1        | POPTR_0017s12210.1    |
| 25     | KoNAC41           | AT5G07680.1        | POPTR_0001s02710.1    |
| 26     | KoNAC43           | AT3G18400.1        | POPTR_0001s45250.1    |
| 27     | KoNAC44           | AT4G29230.1        | POPTR_0014s10320.1    |
| 28     | KoNAC45           | AT3G10480.3        | POPTR_0002s03830.1    |
| 29     | KoNAC46           | AT2G24430.1        | POPTR_0011s05740.1    |
| 30     | KoNAC47           | AT4G17980.1        | POPTR_0001s13380.1    |

**Table S3 (continued).** Common orthologous gene pairs of *K. obovata* between *Arabidopsis* and poplar

| Number | <i>K. obovata</i> | <i>Arabidopsis</i> | <i>P. trichocarpa</i> |
|--------|-------------------|--------------------|-----------------------|
| 31     | KoNAC48           | AT5G62380.1        | POPTR_0010s17350.1    |
| 32     | KoNAC49           | AT2G46770.1        | POPTR_0010s13980.1    |
| 33     | KoNAC5            | AT5G09330.1        | POPTR_0001s33260.1    |
| 34     | KoNAC51           | AT4G01520.1        | POPTR_0001s13380.1    |
| 35     | KoNAC54           | AT4G28530.1        | POPTR_0001s45700.1    |
| 36     | KoNAC55           | AT4G28500.1        | POPTR_0001s00220.1    |
| 37     | KoNAC56           | AT5G13180.1        | POPTR_0001s02710.1    |
| 38     | KoNAC57           | AT5G62380.1        | POPTR_0001s22630.1    |
| 39     | KoNAC58           | AT1G25580.1        | POPTR_0001s41460.1    |
| 40     | KoNAC59           | AT5G13180.1        | POPTR_0001s02710.1    |
| 41     | KoNAC6            | AT5G63790.1        | POPTR_0008s03170.1    |
| 42     | KoNAC60           | AT5G24590.2        | POPTR_0001s45700.1    |
| 43     | KoNAC61           | AT5G62380.1        | POPTR_0010s17350.1    |
| 44     | KoNAC62           | AT4G17980.1        | POPTR_0001s13380.1    |
| 45     | KoNAC64           | AT3G44350.2        | POPTR_0001s22630.1    |
| 46     | KoNAC66           | AT3G15500.1        | POPTR_0002s05820.1    |
| 47     | KoNAC7            | AT3G29035.1        | POPTR_0018s06790.1    |
| 48     | KoNAC8            | AT5G39820.1        | POPTR_0007s04780.1    |
| 49     | KoNAC9            | AT5G50820.1        | POPTR_0017s11830.1    |
