# Supplementary material for: Genome-Wide Identification and Expression Analysis of the NAC Gene Family in Kandelia obovata, a Typical Mangrove Plant
Source: MDPI journal article supplement (doi:10.3390/cimb44110381), 2022-11-13
Supplement: s1 [file s1]

**Table S6.** Number of stress-related cis-regulatory elements in the promoter regions of the differentially expressed *KoNAC* genes.

| Genes          | LTR | STRE | ARE | ABRE | ERE | TGACG-motif | WRE3 | WUN |
|----------------|-----|------|-----|------|-----|-------------|------|-----|
| <i>KoNAC6</i>  | 0   | 1    | 1   | 7    | 1   | 4           | 4    | 0   |
| <i>KoNAC11</i> | 1   | 1    | 1   | 2    | 0   | 0           | 1    | 0   |
| <i>KoNAC15</i> | 0   | 1    | 1   | 6    | 1   | 12          | 0    | 1   |
| <i>KoNAC20</i> | 1   | 5    | 2   | 1    | 1   | 1           | 1    | 1   |
| <i>KoNAC24</i> | 1   | 1    | 0   | 2    | 0   | 6           | 2    | 1   |
| <i>KoNAC26</i> | 0   | 2    | 0   | 9    | 2   | 8           | 0    | 0   |
| <i>KoNAC32</i> | 0   | 1    | 0   | 15   | 1   | 4           | 0    | 0   |
| <i>KoNAC35</i> | 0   | 3    | 0   | 5    | 1   | 6           | 0    | 2   |
| <i>KoNAC38</i> | 2   | 4    | 3   | 4    | 0   | 4           | 1    | 0   |
| <i>KoNAC41</i> | 1   | 2    | 4   | 5    | 2   | 0           | 0    | 1   |
| <i>KoNAC51</i> | 1   | 0    | 2   | 3    | 1   | 4           | 0    | 2   |
| <i>KoNAC62</i> | 2   | 1    | 0   | 3    | 0   | 2           | 0    | 0   |
| <i>KoNAC68</i> | 1   | 1    | 2   | 4    | 1   | 0           | 1    | 1   |
