# Supplementary material for: Genome-Wide Identification and Expression Analysis of the NAC Gene Family in Kandelia obovata, a Typical Mangrove Plant
Source: MDPI journal article supplement (doi:10.3390/cimb44110381), 2022-11-13
Supplement: s1 [file s1]

**Table S2.** The primers of *KoNAC* genes in this study

| Gene Name      | Forward primer (5'-3') | Reverse primer (5'-3') |
|----------------|------------------------|------------------------|
| <i>KoNAC6</i>  | TGAGGTCACGTGTGAGAAGG   | CATGTCTTGCGAAGGTGAGA   |
| <i>KoNAC15</i> | CGCCCAGAAATAGAAATGGA   | CACTCTGGACCTCCTTCTCG   |
| <i>KoNAC20</i> | CTCTGCAGCACGTGGTTTTA   | GGGGTCCTGGTTCCAGTTAT   |
| <i>KoNAC38</i> | GCCTGCAGAGTGGATAGGAG   | GATGCATTGCTGTCTCTGGA   |
| <i>KoNAC51</i> | TTGCGGTCTACCTGCTCTTT   | ATCCAGTCCTCGTCCCTTTT   |
| <i>KoActin</i> | CAATGCAGCAGTTGAAGGAA   | CTGCTGGAAGGAACCAAGAG   |
