# Supplementary material for: Genome-Wide Identification and Expression Analysis of the NAC Gene Family in Kandelia obovata, a Typical Mangrove Plant
Source: Curr Issues Mol Biol. 2022 Nov 13;44(11):5622–37. doi: 10.3390/cimb44110381 (PMC9689236; doi:10.3390/cimb44110381)
Supplement: Supplementary file 1 [file cimb-44-00381-s001.zip]

Archive with 7 entries (7 files):
- Figure S1.R1.pdf
- Table S1_R1.pdf
- Table S2_R1.pdf
- Table S3_R1.pdf
- Table S4_R1.pdf
- Table S5_R1.pdf
- Table S6_R1.pdf
